# Supplementary material for: Quantitative formation and clean metal exchange processes of large void (>5000 Å3) nanobox structures
Source: Royal Society of Chemistry journal article supplement (doi:10.1039/b207801e), 2002-01-01
Supplement: b207801e.pdf [file b207801e.pdf]

## Supporting data

### Quantitative Formation and Clean Metal Exchange Processes of Large Void (> 5000 Å<sup>3</sup>) Nanobox Structures

Michael Schmittel,\* Horst Ammon, Venkateswarlu Kalsani,  
Andreas Wiegrefe, and Christoph Michel

#### Preparation of copper(I) complexes A-C

A mixture of copper (I) complexes A-C was obtained by reaction of the corresponding linear ligand **1** with macrocycle **3** and [Cu(CH<sub>3</sub>CN)<sub>4</sub>](PF<sub>6</sub>) in dry methylene chloride at room temperature. The formation of the copper complexes was immediately visible by their characteristic dark red colour. The ESI-MS shows formation of (at least!) three different copper(I) phenanthroline aggregates.

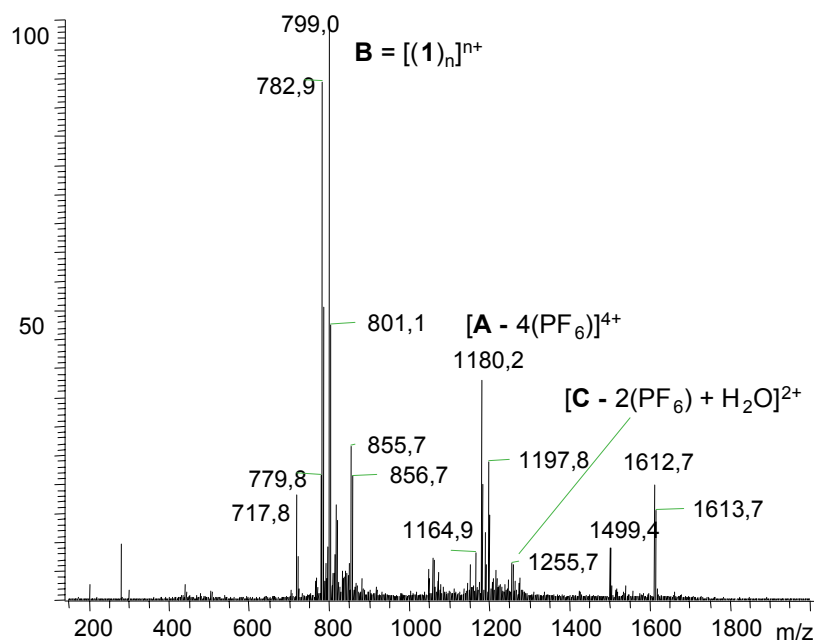

**Figure 1.** ESI-MS spectrum of the reaction mixture resulting from ligand **1** with macrocycle **3** and [Cu(CH<sub>3</sub>CN)<sub>4</sub>](PF<sub>6</sub>) in dry methylene chloride at room temperature. More details are contained in table 1.

**Table 1:** ESI-MS data for the reaction mixture containing **A-C** (mass range 300-2000 Dalton).

|                                      | Schematic | Ions observed                                                                                                                                                                                                                                                                                                                        | Calcd.<br><i>m/z</i>                                     | Exp.<br><i>m/z</i>                        | %<br>[%]                   |
|--------------------------------------|-----------|--------------------------------------------------------------------------------------------------------------------------------------------------------------------------------------------------------------------------------------------------------------------------------------------------------------------------------------|----------------------------------------------------------|-------------------------------------------|----------------------------|
| [2+2]-box <b>A</b>                   |           | [ <b>A</b> ] <sup>+</sup><br>[ <b>A</b> - 2 PF <sub>6</sub> ] <sup>2+</sup><br>[ <b>A</b> - 3 PF <sub>6</sub> ] <sup>3+</sup><br>[ <b>A</b> + 4 H <sub>2</sub> O - 4 PF <sub>6</sub> ] <sup>4+</sup><br>[ <b>A</b> - 4 PF <sub>6</sub> ] <sup>4+</sup><br>[Cu( <b>3</b> )(H <sub>2</sub> O) <sub>2</sub> ] <sup>+</sup>              | 5299.9<br>2505.0<br>1621.6<br>1198.0<br>1180.0<br>1613.6 | –<br>–<br>–<br>1197.8<br>1180.2<br>1613.7 | <br><br><br>24<br>38<br>18 |
| triangle <b>C</b> + H <sub>2</sub> O |           | [Cu <sub>3</sub> ( <b>1</b> ) <sub>3</sub> (PF <sub>6</sub> )(H <sub>2</sub> O)] <sup>2+</sup>                                                                                                                                                                                                                                       | 1255.2                                                   | 1255.7                                    | 5                          |
| bis-heteroleptic complex             |           | [Cu <sub>3</sub> ( <b>1</b> ) <sub>2</sub> ( <b>3</b> )(H <sub>2</sub> O) <sub>2</sub> ] <sup>3+</sup>                                                                                                                                                                                                                               | 1059.5                                                   | 1058.9                                    | 8                          |
| [ <i>n</i> ]-polymer <b>B</b>        |           | [Cu <sub><i>n</i></sub> ( <b>1</b> ) <sub><i>n</i></sub> (H <sub>2</sub> O) <sub>2<i>n</i></sub> ] <sup><i>n</i>+</sup><br>[Cu <sub><i>n</i></sub> ( <b>1</b> ) <sub><i>n</i></sub> (H <sub>2</sub> O) <sub><i>n</i></sub> ] <sup><i>n</i>+</sup><br>[Cu <sub><i>n</i></sub> ( <b>1</b> ) <sub><i>n</i></sub> ] <sup><i>n</i>+</sup> | 818.5<br>800.3<br>782.5                                  | 818.3<br>800.1<br>782.9                   | 15<br>100<br>90            |
| Homoleptic complex                   |           | [Cu( <b>1</b> ) <sub>2</sub> ] <sup>+</sup>                                                                                                                                                                                                                                                                                          | 1499.5                                                   | 1499.4                                    | 10                         |
| Ligand                               | <b>1</b>  | [ <b>1</b> ] <sup>+</sup>                                                                                                                                                                                                                                                                                                            | 718.9                                                    | 717.8                                     | 18                         |

### General procedure for the preparation of the copper(I) nanoboxes [**4**](PF<sub>6</sub>)<sub>4</sub>:

The copper (I) complexes **4a,b**<sup>4+</sup> were obtained by reaction of the corresponding linear ligands **2a,b** with macrocycle **3** and [Cu(CH<sub>3</sub>CN)<sub>4</sub>](PF<sub>6</sub>) in dry methylene chloride at room temperature. The formation of the copper complexes **4a,b**<sup>4+</sup> was immediately visible by their characteristic dark red colour. After a few minutes the solution was then evaporated to dryness affording a red solid, which was then further characterized.

### General procedure for the preparation of the silver(I) nanoboxes [**5**](PF<sub>6</sub>)<sub>4</sub>:

The silver (I) complexes **5a,b**<sup>4+</sup> were obtained by treatment of the corresponding linear ligands **2a,b** with macrocycle **3** and AgBF<sub>4</sub> in dry methylene chloride at room temperature. The formation of silver complexes **5a,b**<sup>4+</sup> was immediately recognized by their characteristic yellow colour. The solution was then evaporated to dryness furnishing a yellow solid, which was then further characterized.

### Characterization of **[4a](PF<sub>6</sub>)<sub>4</sub>**:

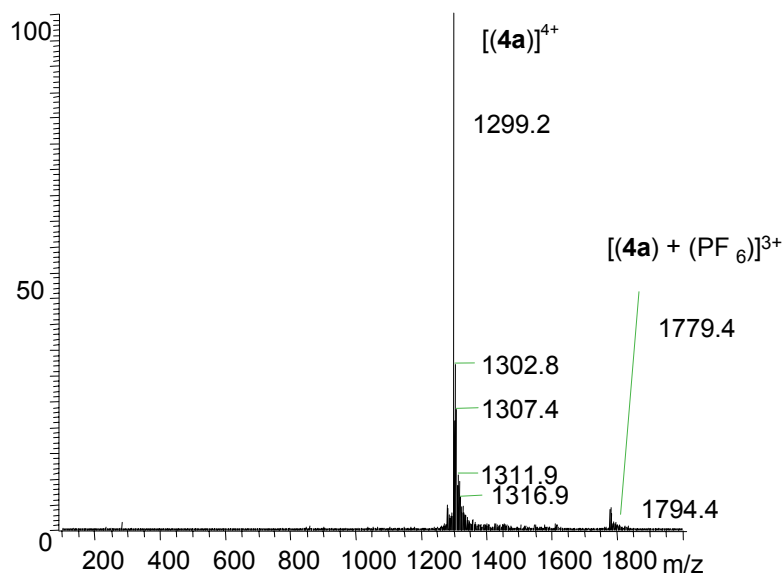

**Figure 2.** ESI-MS of **4a**<sup>4+</sup> in acetone at room temperature (150 – 2000 Dalton).

### Characterization of **[4b](PF<sub>6</sub>)<sub>4</sub>**

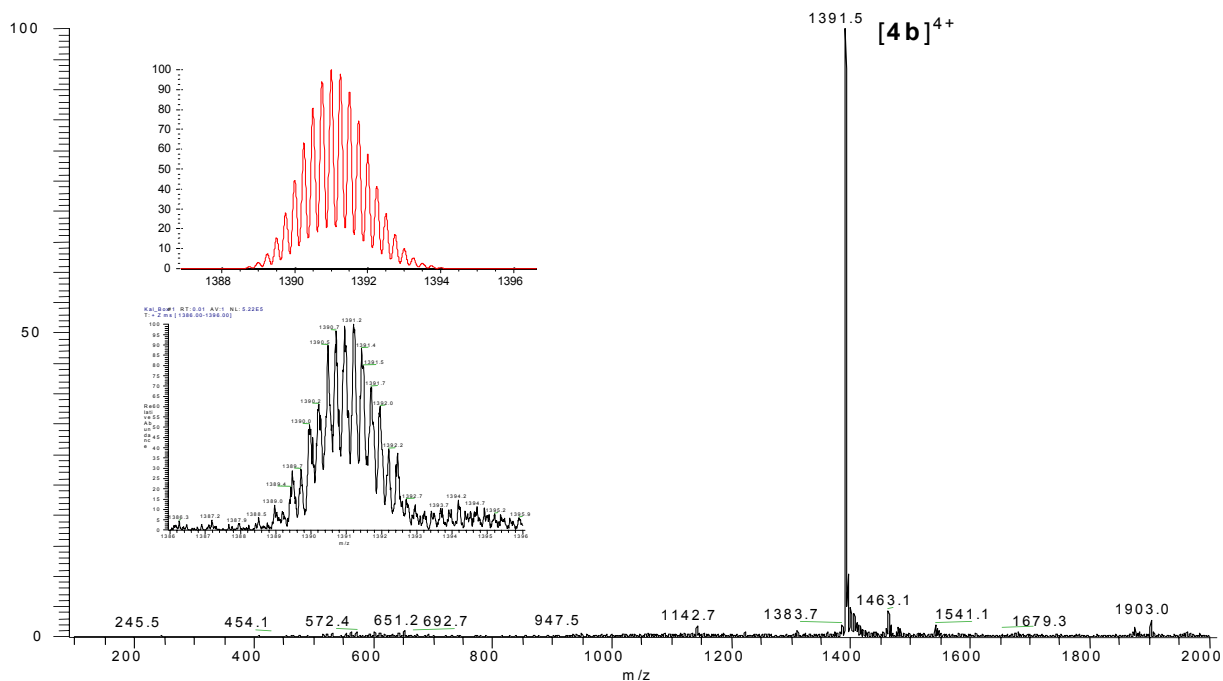

**Figure 3.** ESI-MS of nanobox **4b**<sup>4+</sup> in acetone at room temperature (100 – 2000 Dalton) including isotopic splitting (insert top: calcd.; insert bottom: exp.).

Characterization of [5a](PF<sub>6</sub>)<sub>4</sub>.

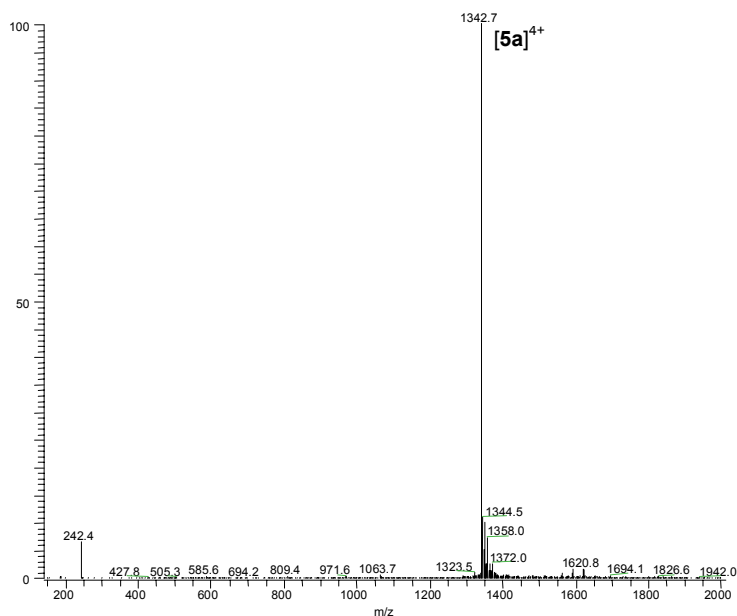

**Figure 4.** ESI-MS of **5a**<sup>4+</sup> in methylene chloride at room temperature (150 – 2000 Dalton).

Characterization of [5b](PF<sub>6</sub>)<sub>4</sub>.

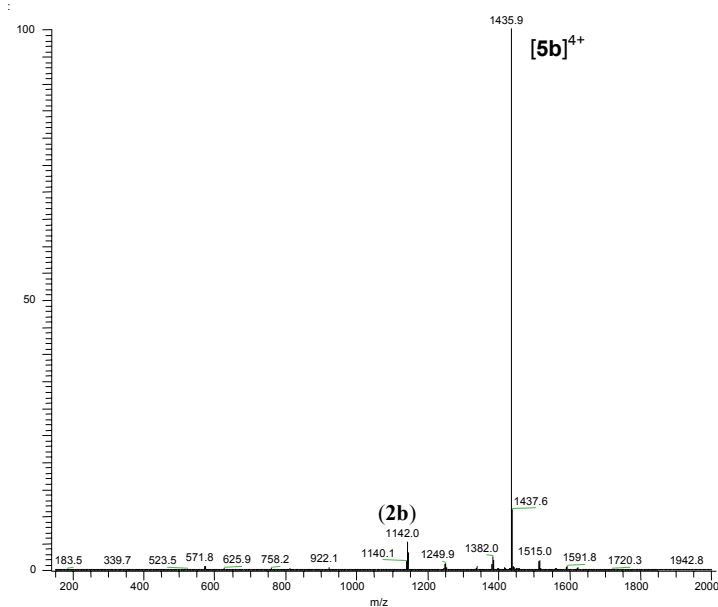

**Figure 5.** ESI-MS of nanobox **5b**<sup>4+</sup> in methylene chloride at room temperature (150 – 2000 Dalton).

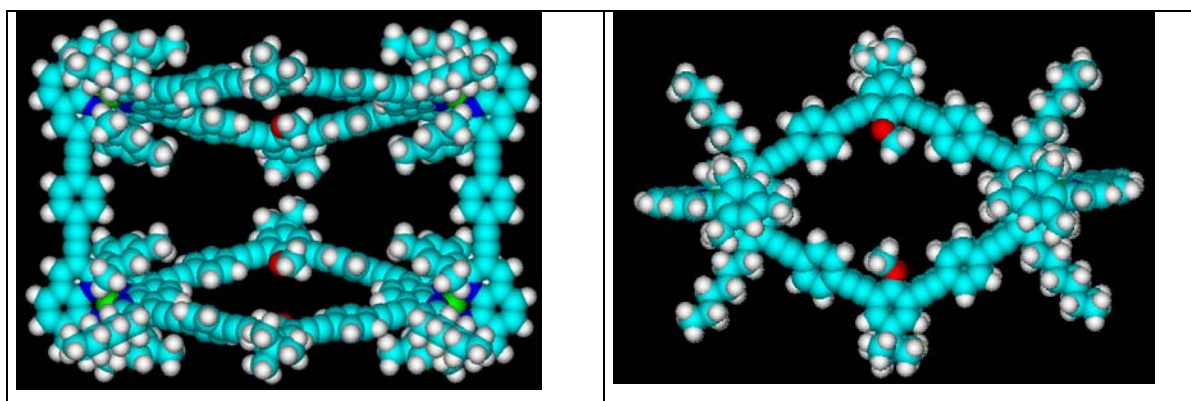

**Figure 6.** Two perspective views of nanobox **4a** (calculated by Hyperchem<sup>®</sup>)

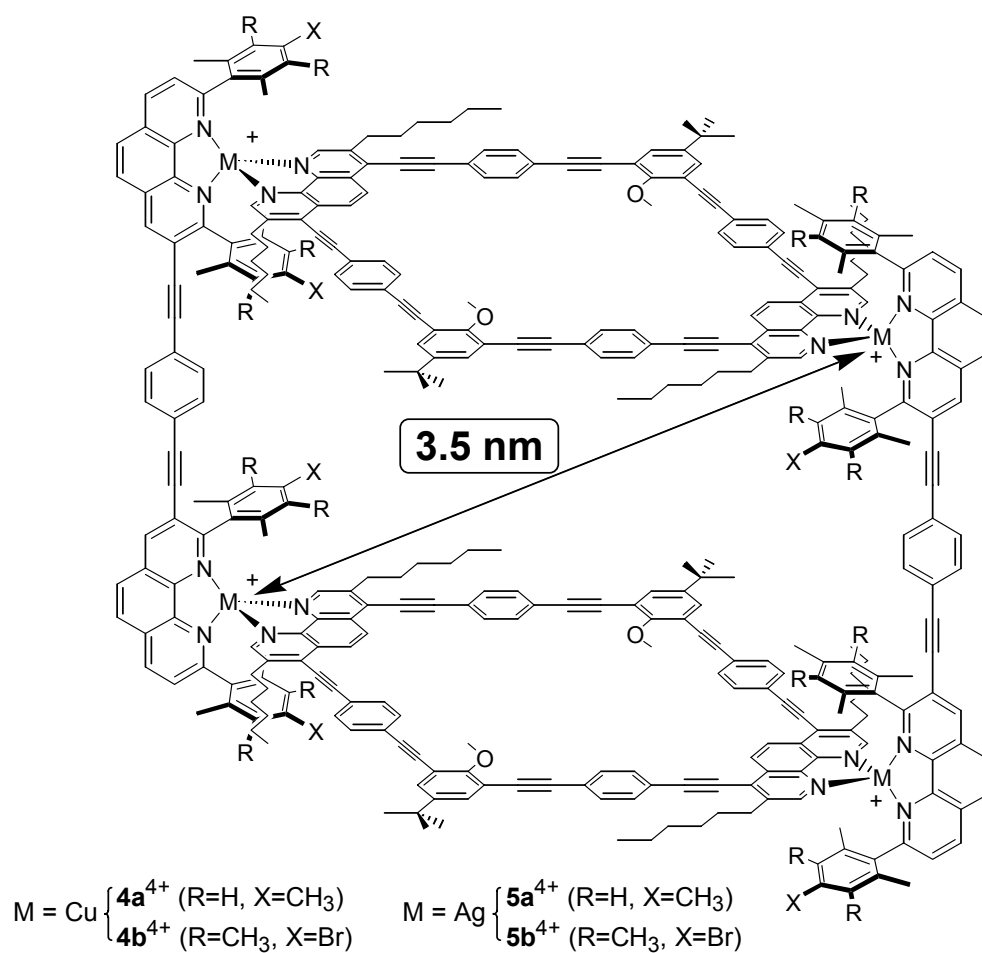

**Figure 7.** Dimensions of the box.

Conversion of Silver(I) → Copper(I) Nanobox:  $5b^{4+} \rightarrow 4b^{4+}$ .

ESI-MS showing the signals corresponding to the intermediate nanobox structures formed through successive exchange of  $Ag^+$  by  $Cu^+$  starting from  $[5b](PF_6)_4$  (in methylene chloride, room temperature, ESI-spectra: 1370 – 1450 Dalton). The metal exchange was obtained by treatment of silver box  $[5b](PF_6)_4$  (3.5  $\mu$ mol) with CuI (14.7  $\mu$ mol). After 180 min the formation of  $[4b](PF_6)_4$  was almost complete. In the spectrum below the situation is depicted for  $t = 24$  h.

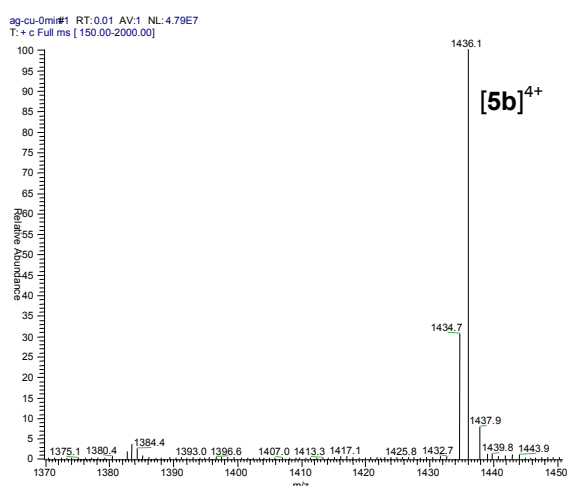

a) ESI-MS of the pure nanobox  $5b^{4+}$

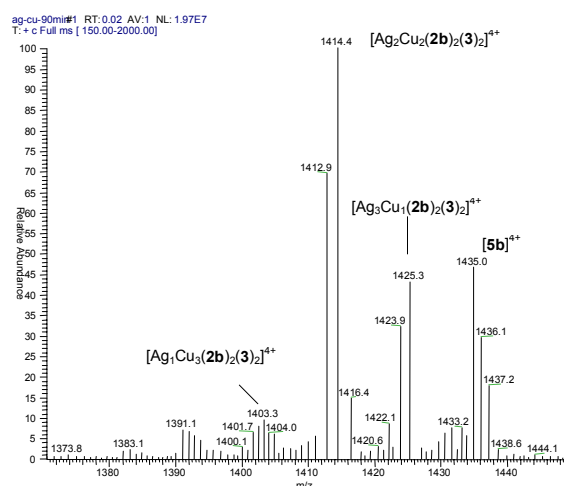

b) ESI-MS after 90 min.

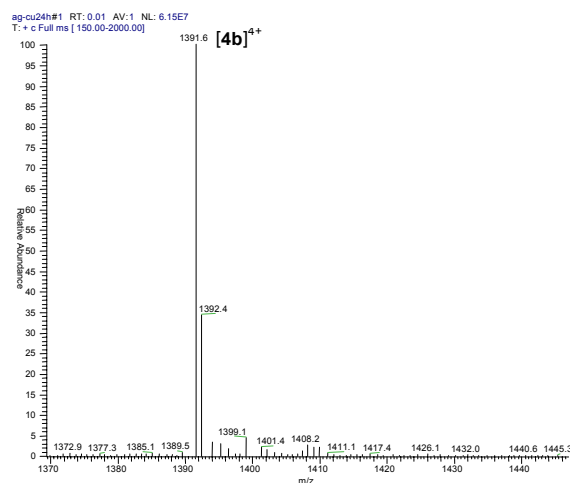

c) ESI-MS after 24 h, which corresponds to pure  $4b^{4+}$ .

**Figure 8.** ESI-MS spectra of the silver(I) → copper(I) nanobox conversion.

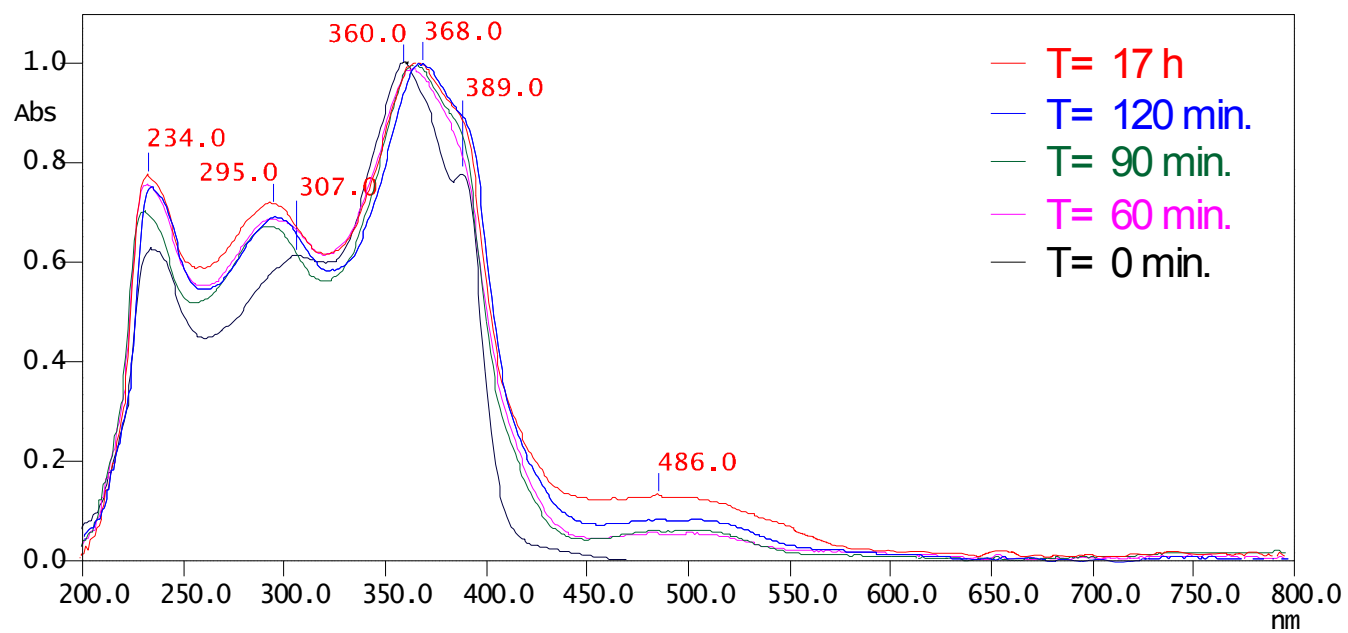

**Figure 9.** UV-Vis spectra of the silver(I) → copper(I) nanobox conversion.
